# Supplementary material for: Respiration climacteric in tomato fruits elucidated by constraint‐based modelling
Source: PubMed Central journal article supplement (PMC6079640; doi:10.1111/nph.14301), 2016-11-15
Supplement: NPH-213-1726-s001.pdf [file NPH-213-1726-s001.pdf]

## ***New Phytologist* Supporting Information Figs S1–S9 and Notes S2**

Article title: Respiration climacteric in tomato fruits elucidated by constraint-based modelling

Authors: Sophie Colombié, Bertrand Beauvoit, Christine Nazaret, Camille Bénard, Gilles Vercambre, Sophie Le Gall, Benoit Biais, Cécile Cabasson, Mickaël Maucourt, Stéphane Bernillon, Annick Moing, Martine Dieuaide-Noubhani, Jean-Pierre Mazat and Yves Gibon

Article acceptance date: 22 September 2016

The following Supporting Information is available for this article:

**Fig. S1** Fumarate concentration throughout tomato fruit development.

**Fig. S2** Fit of the accumulated metabolites and biomass compounds.

**Fig. S3** Importance of dissipating fluxes, AOX and UCP, on calculated fluxes.

**Fig. S4** Plant culture and fruit characterisation.

**Fig. S5** Fruit composition throughout development.

**Fig. S6** Origin of CO<sub>2</sub> released throughout tomato fruit development.

**Fig. S7** Galactose and galacturonate throughout the tomato fruit development.

**Fig. S8** Estimated heat from metabolic activities.

**Fig. S9** Fruit temperature and fruit energy variations.

**Table S1** Model description (separate Excel file)

**Table S2** Raw data and fits (separate Excel file)

**Notes S1** Stoichiometric model in *sbml* (separate .xml file).

**Notes S2** Mathematical demonstration of unicity.

**Video S1** Flux maps of water stress compared to control (separate .mp4 file).

**Fig. S1** Fumarate concentration throughout tomato fruit development. Time-course of fumarate content in tomato fruit pericarp measured by  $^1\text{H-NMR}$  throughout the tomato fruit development and every 3 h (zoom in the box) from 24 to 25 days post anthesis.

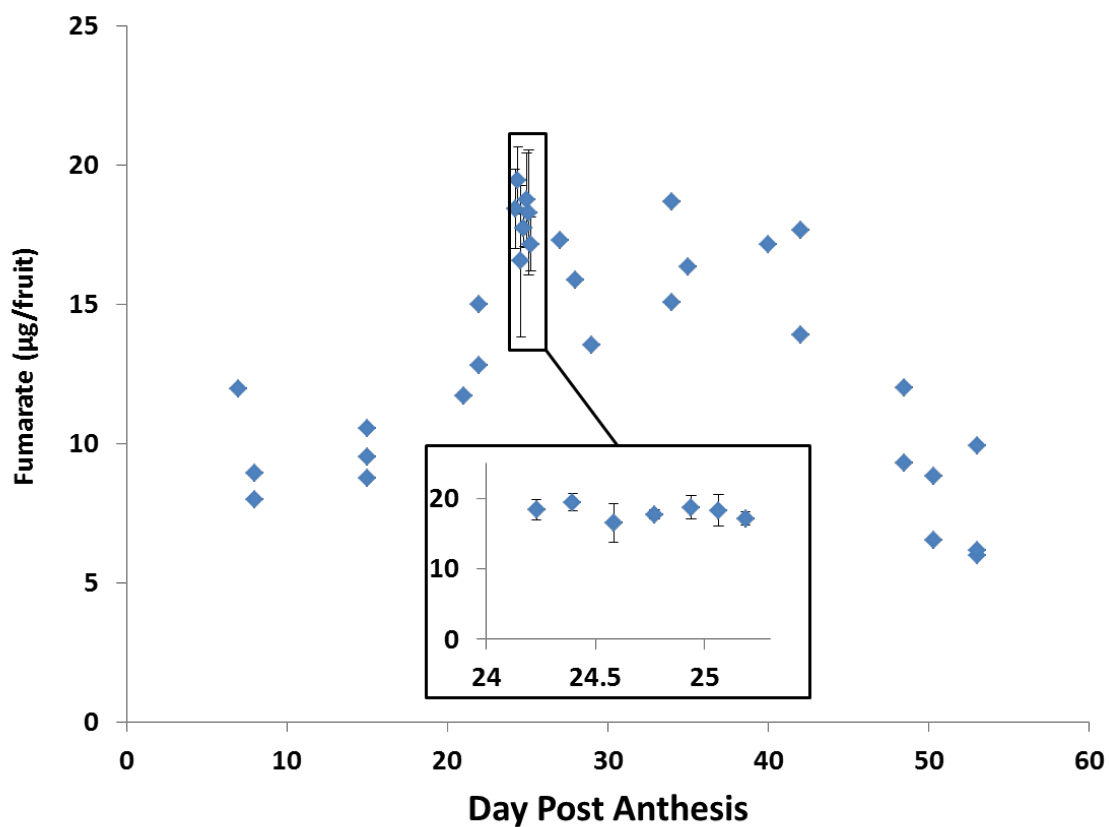

**Fig. S2** Fit of the accumulated metabolites and biomass compounds. Time-course of the 16 accumulated metabolites and biomass compounds (left panel) and the corresponding flux calculated by derivative of the best fit (solid line), minima and maxima outfluxes considering a 95% interval of prediction from the biological variability (dotted lines) under control (blue), water stress (red) and shading (green) conditions .

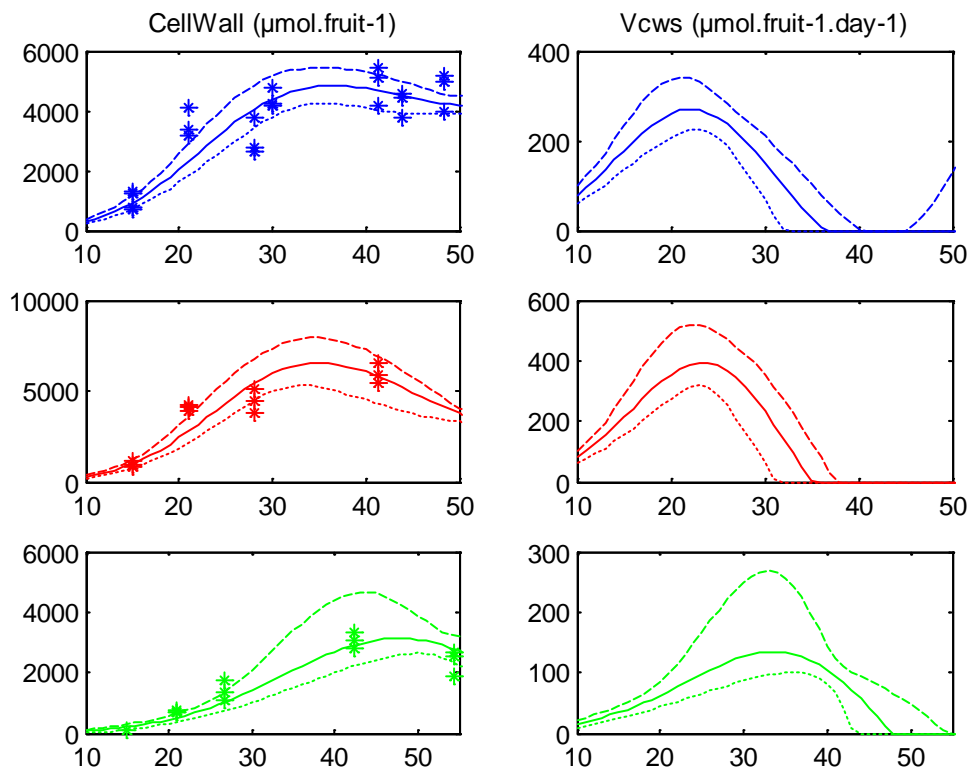

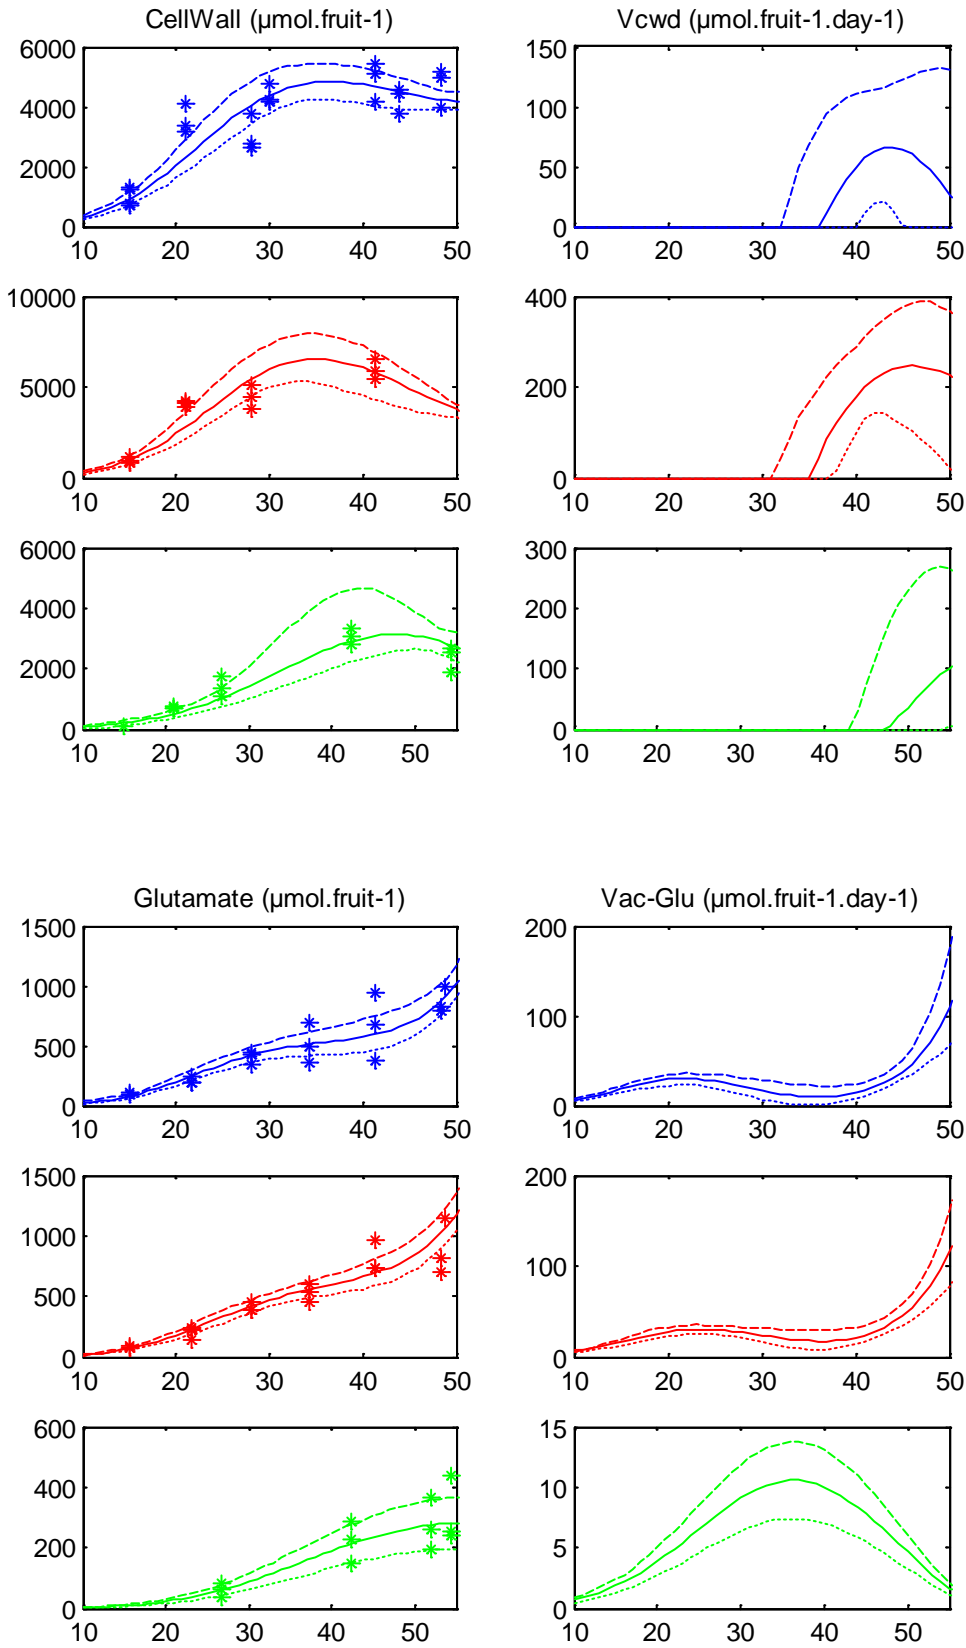

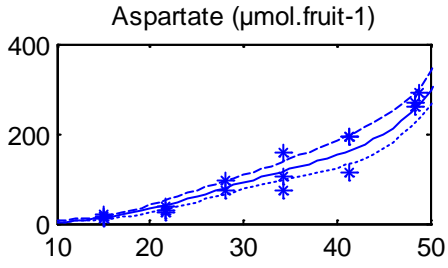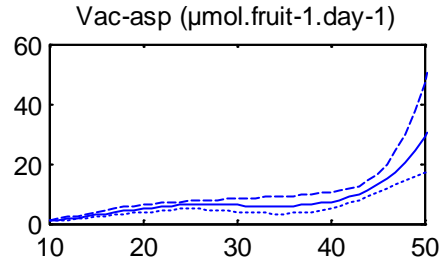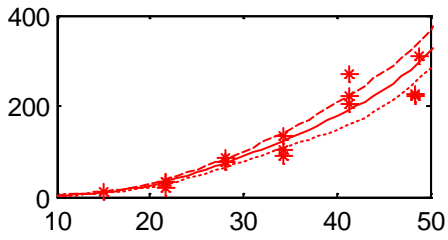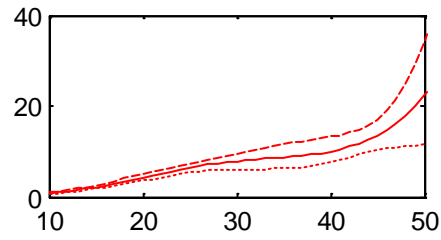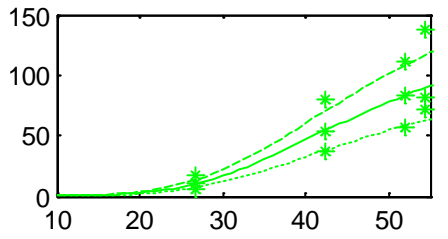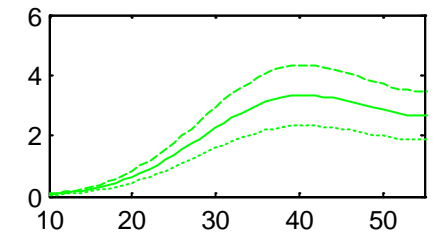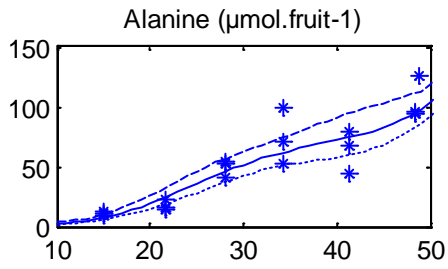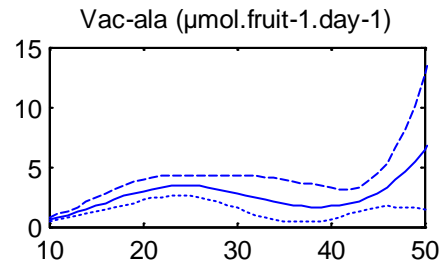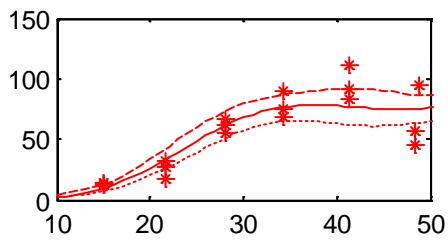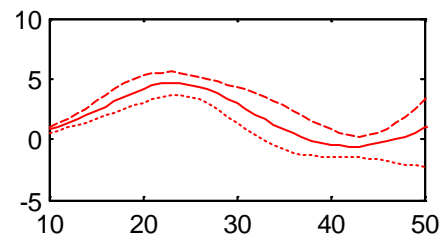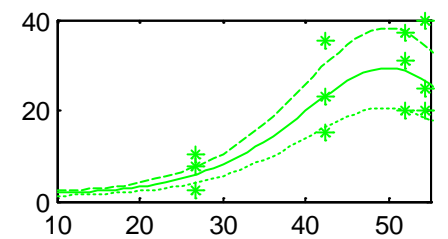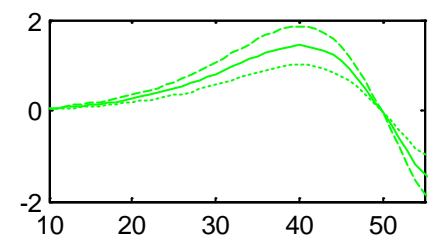

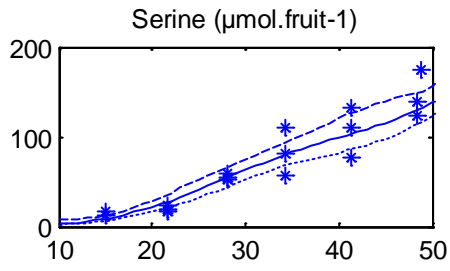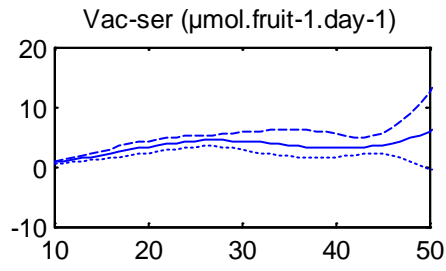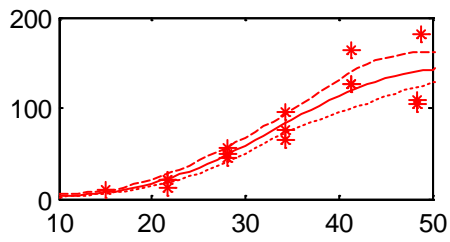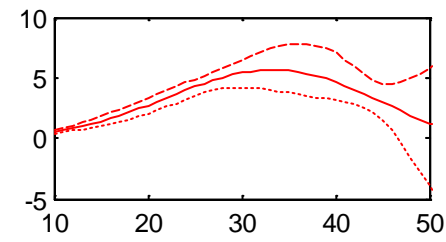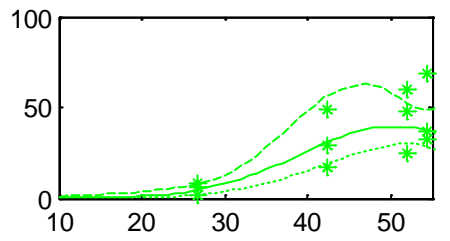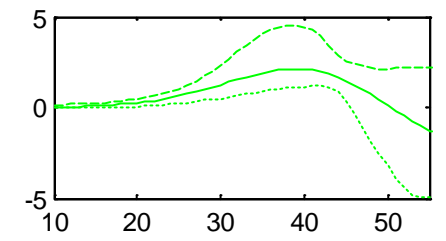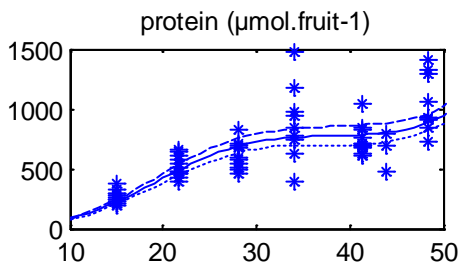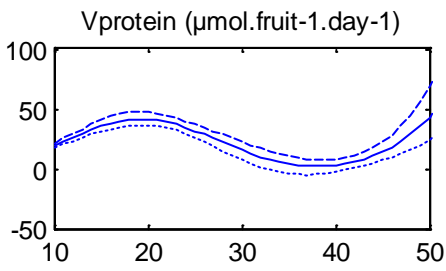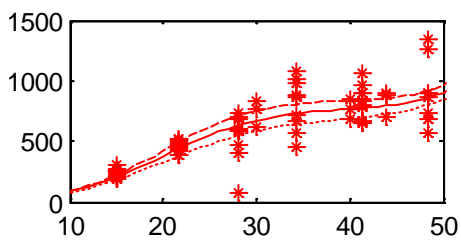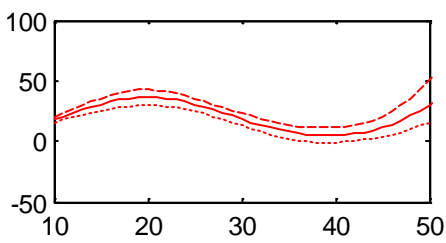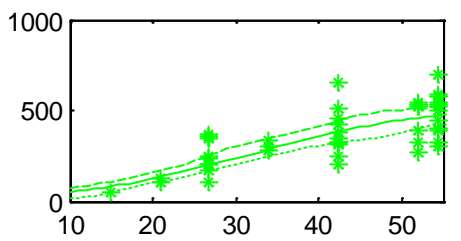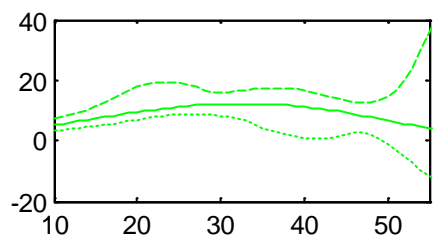

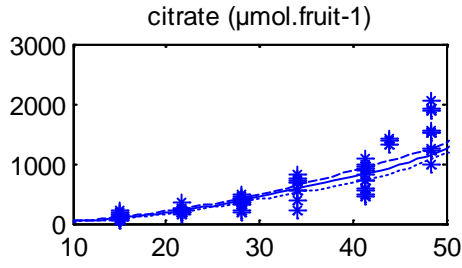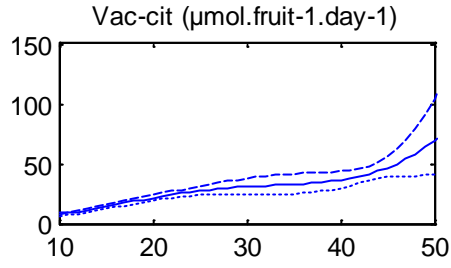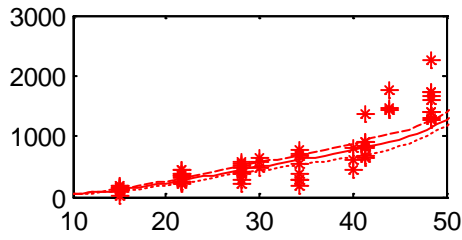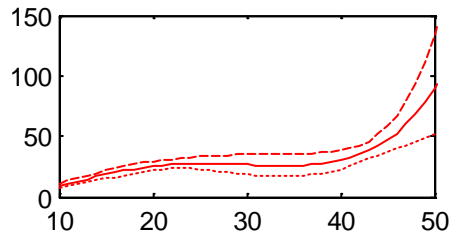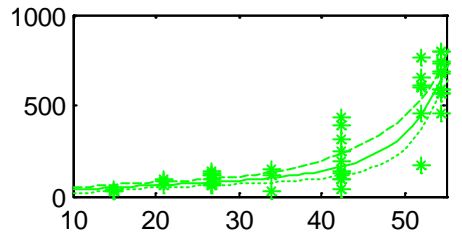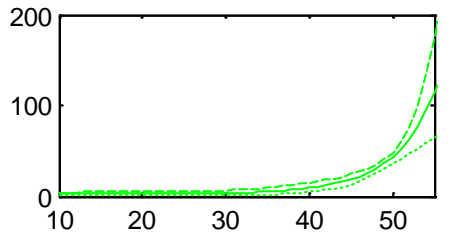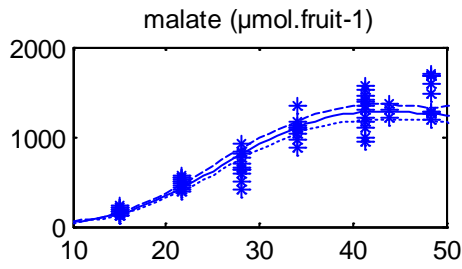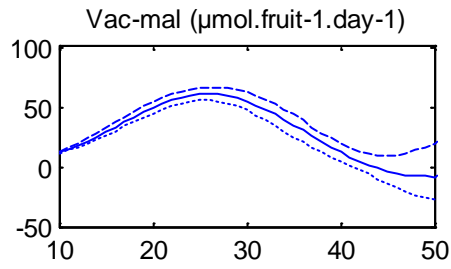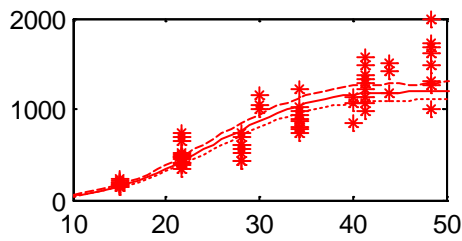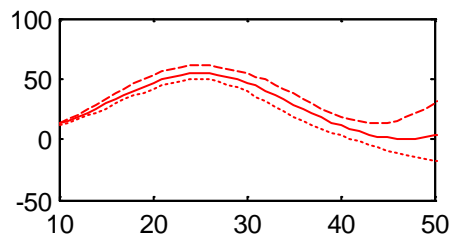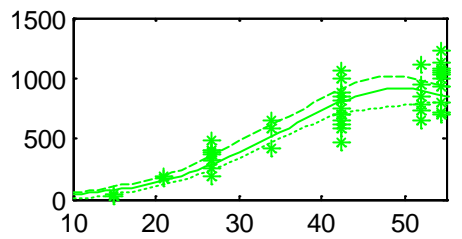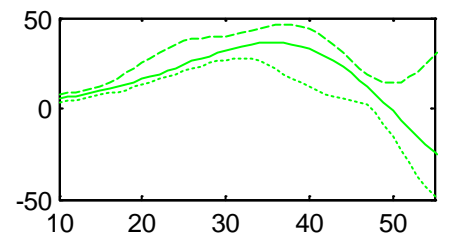

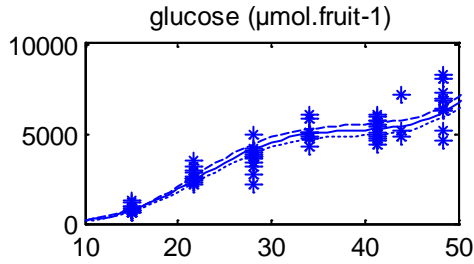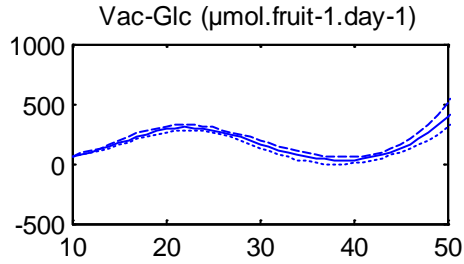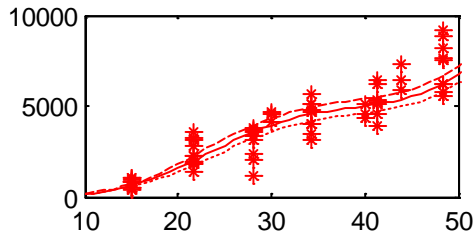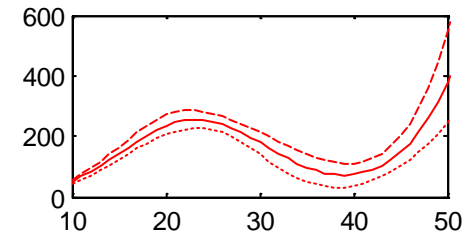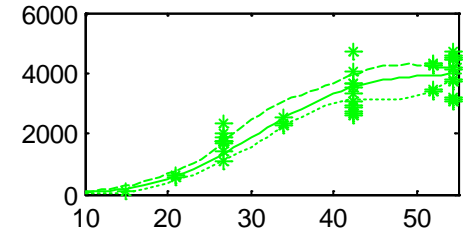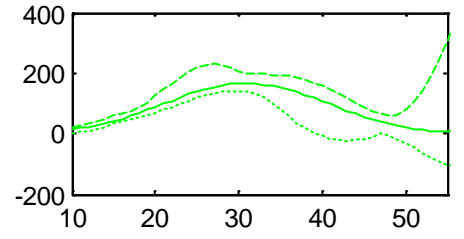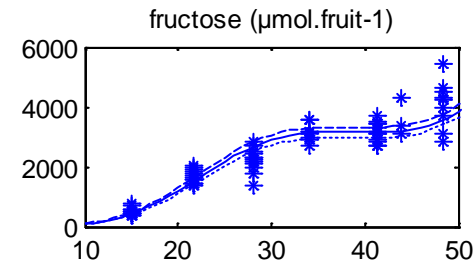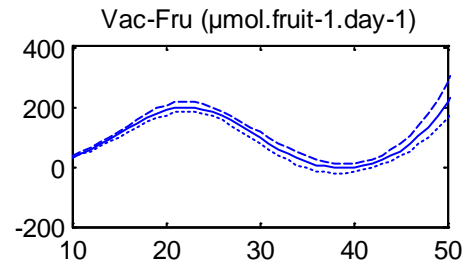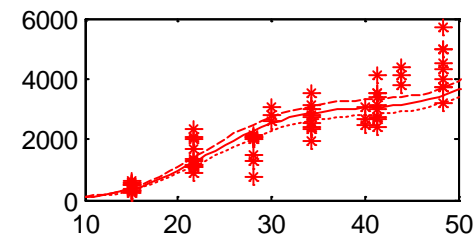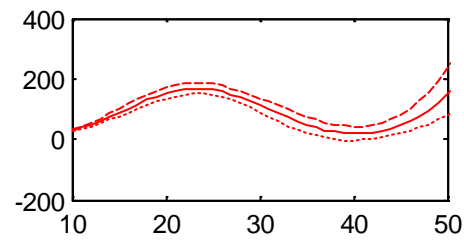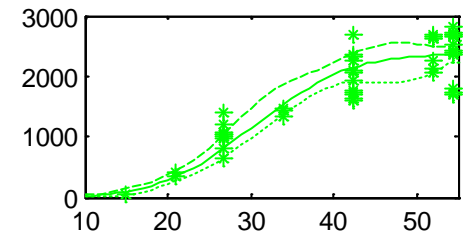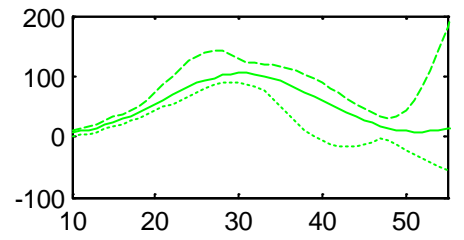



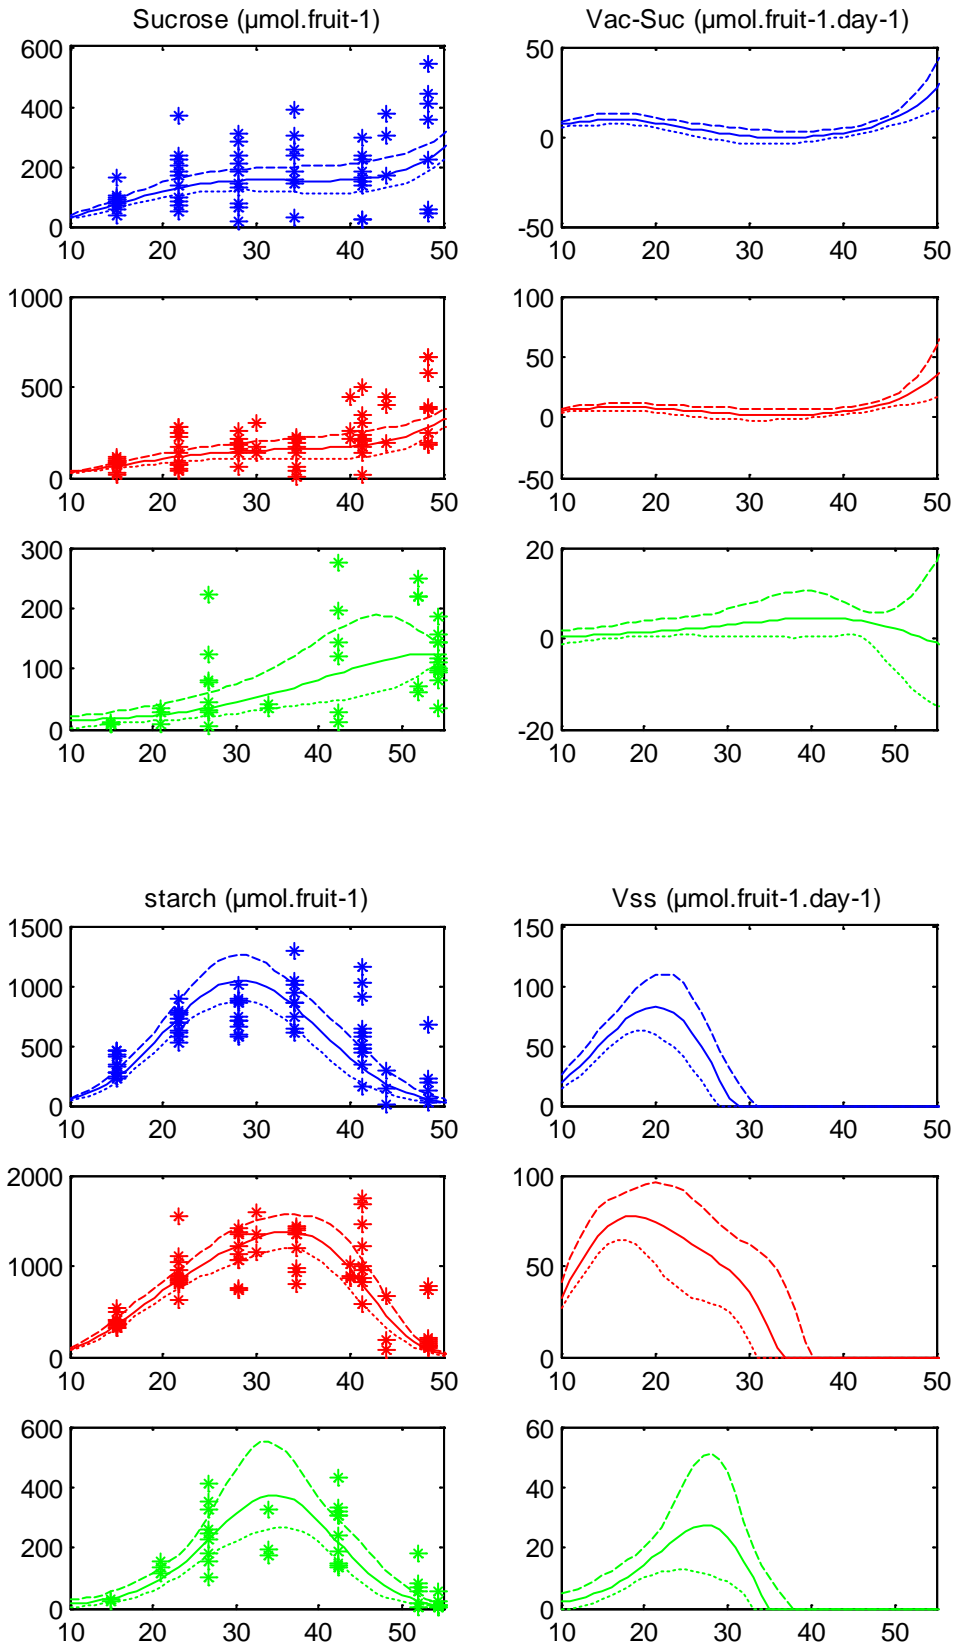

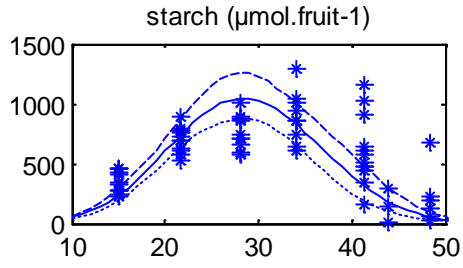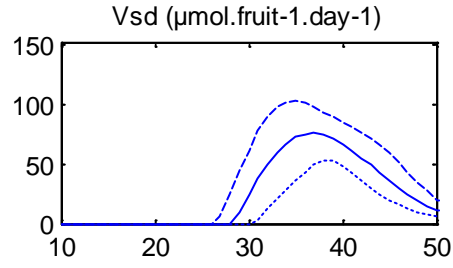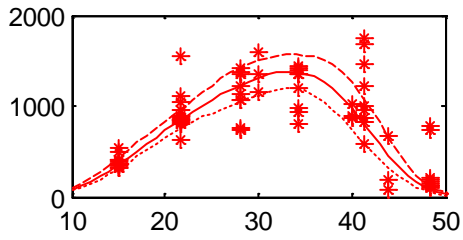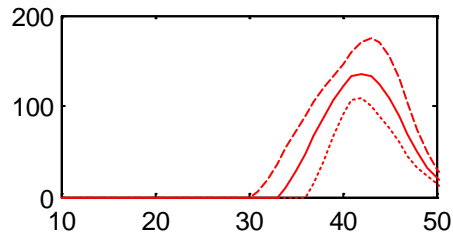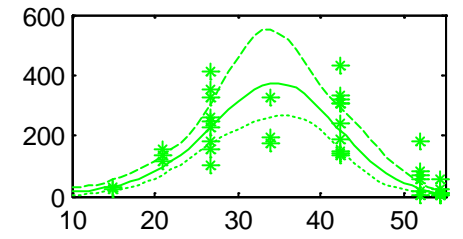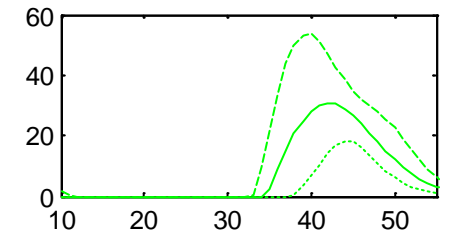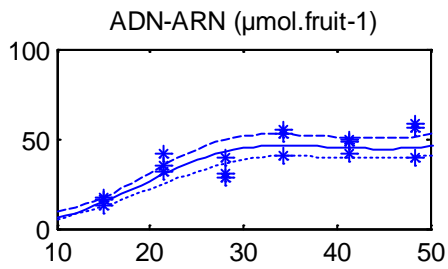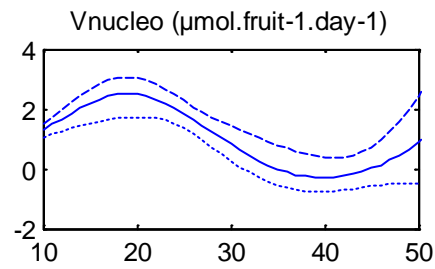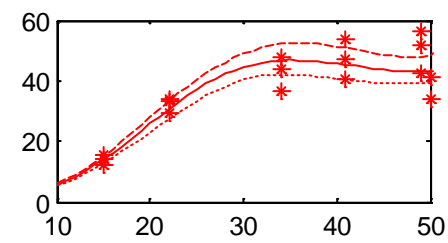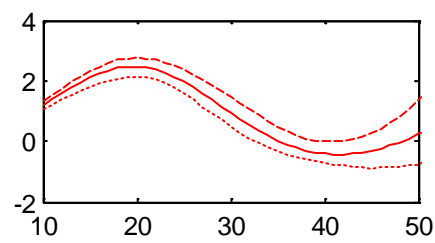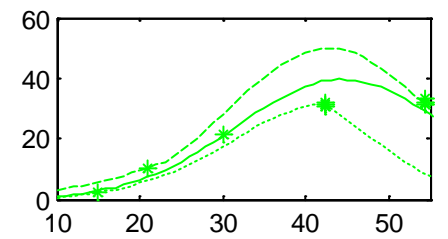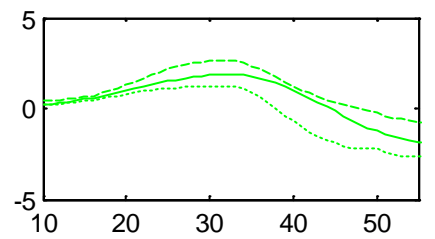

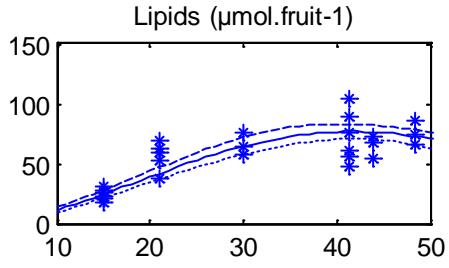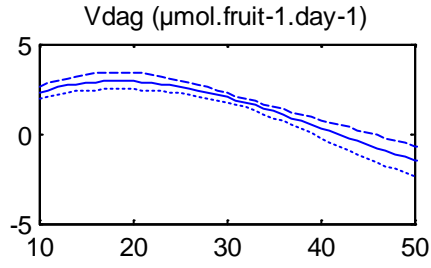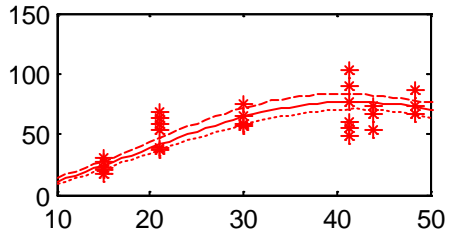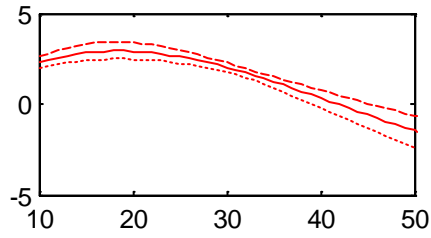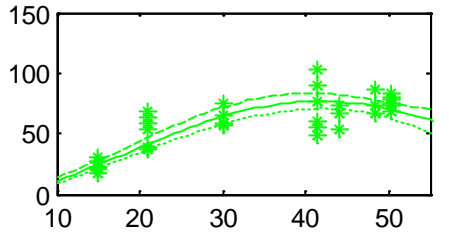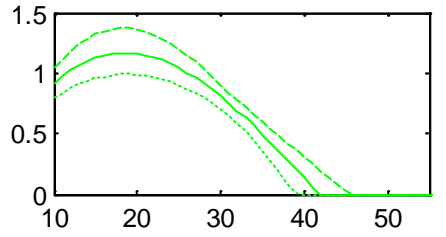

**Fig. S3** Importance of dissipating fluxes, AOX and UCP, on calculated fluxes. Time-course of (a, b) sucrose uptake, (c, d) CO<sub>2</sub> released, and fluxes involved in tomato fruit energetic metabolism: (e, f) the total ATP flux, (g, h) ATP dissipated in maintenance, (i, j) dissipating fluxes through AOXs and (k, l) UCPs. Fluxes expressed on the fruit-basis (left panel) and on the gFW-basis (right panel) with the model solved on a daily basis with the best fit for outfluxes (black), without UCP (light blue), without AOX (dark blue), and without AOX and UCP (green).

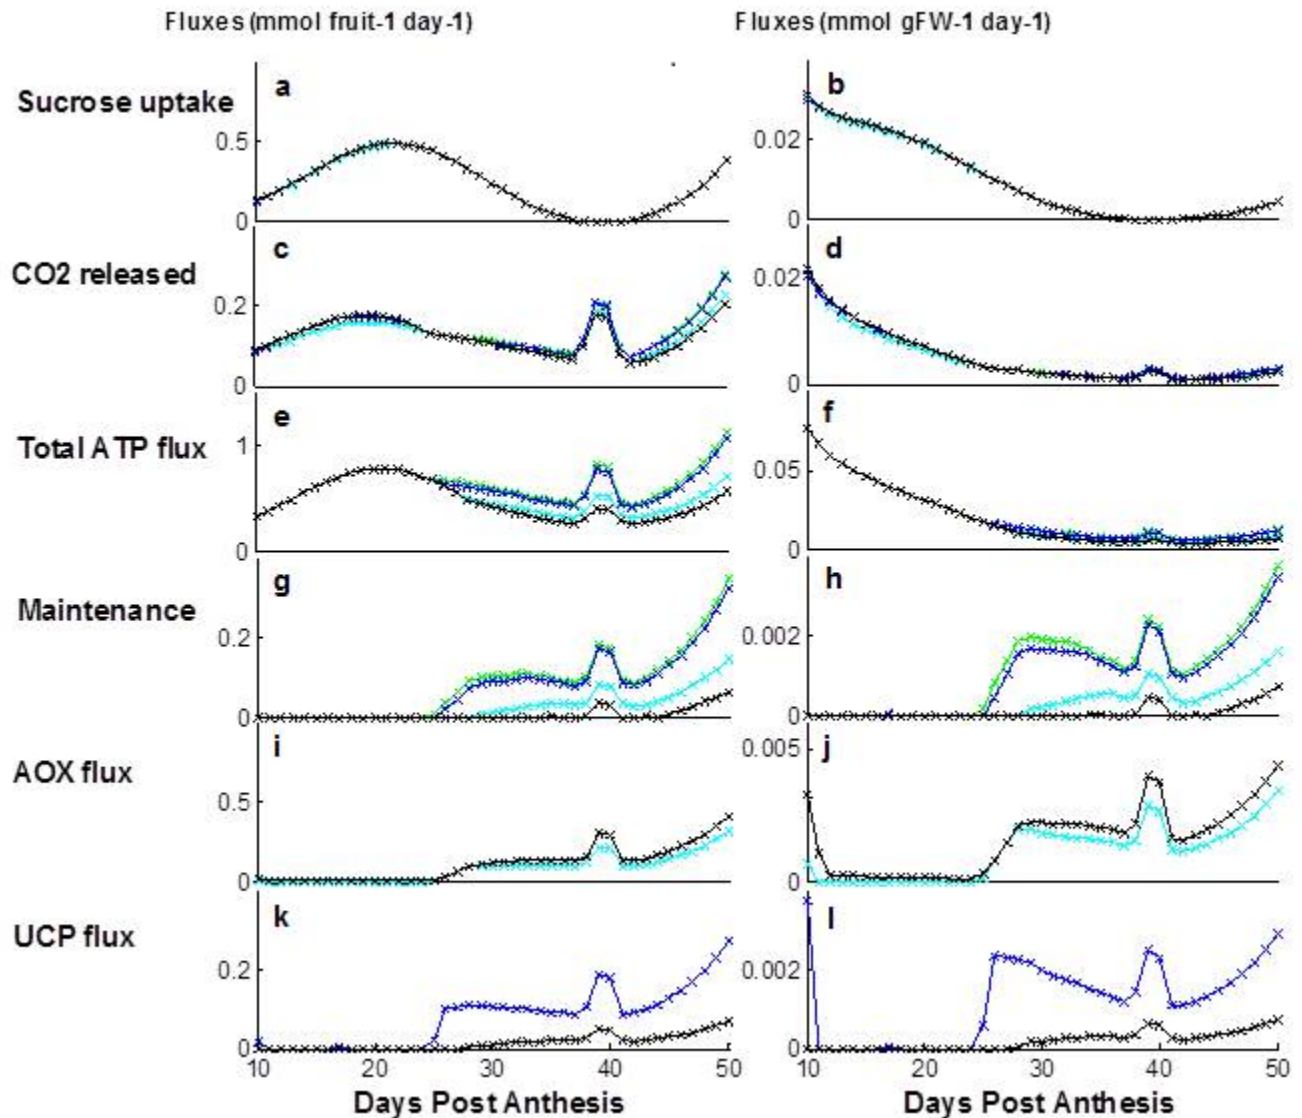

**Fig. S4** Plant culture and fruit characterisation. Characterization of tomato cultures under control (black), water stress (red) and shading (green) conditions with (a) electrical conductivity and (b) hygrometry measured into slabs and (c) drainage during the culture. Characterization of fruits with: (d) fruit FW : DW ratios; (e) fruit (closed symbols) and pericarp (open symbols) dry weight contents and (f) carbon and nitrogen contents in (% DW) at several stages (DPA) of development.

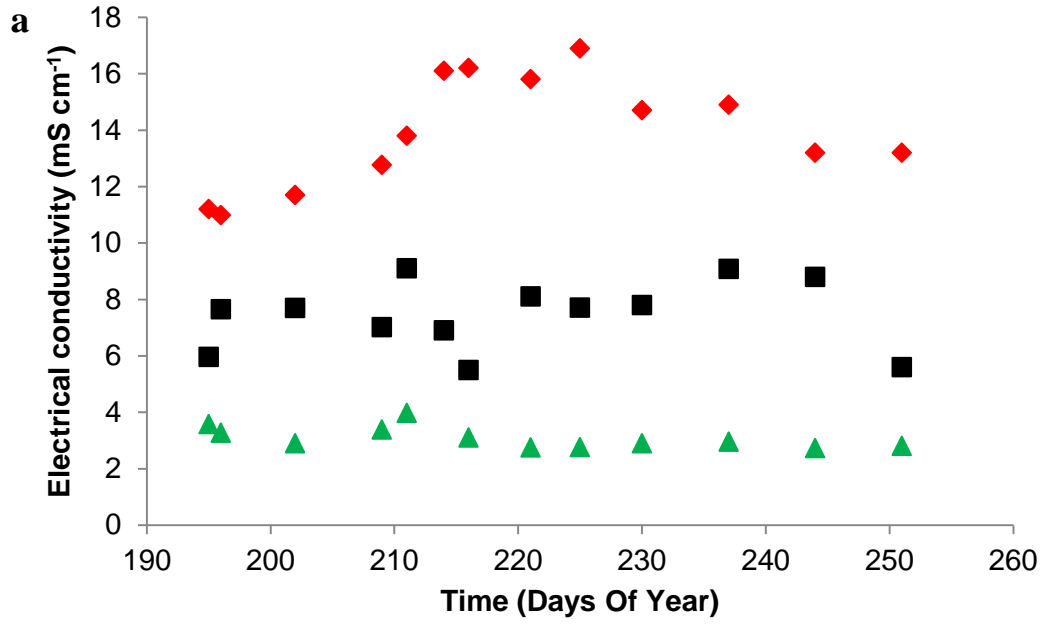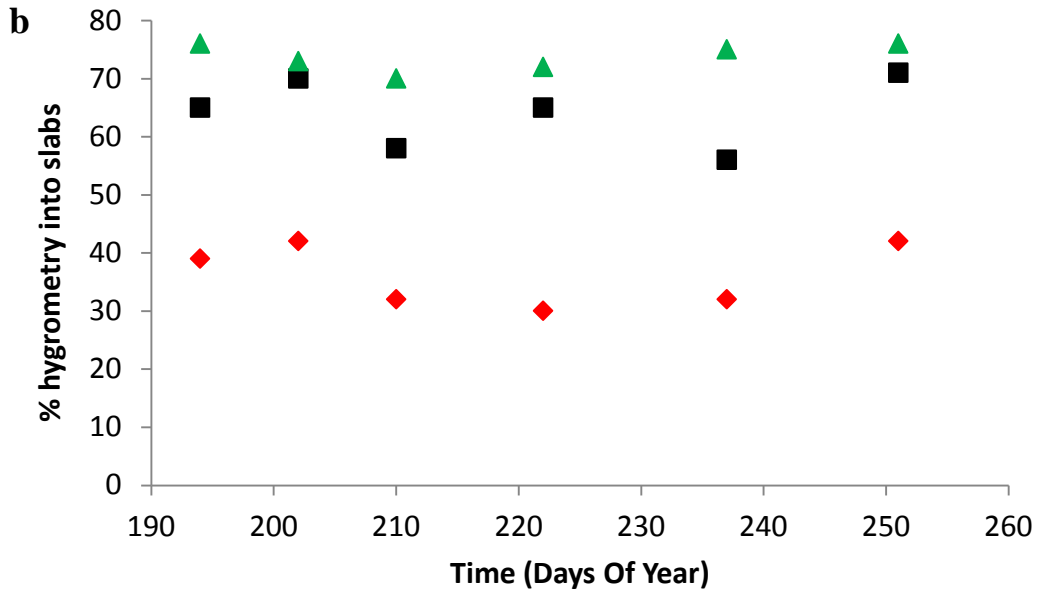

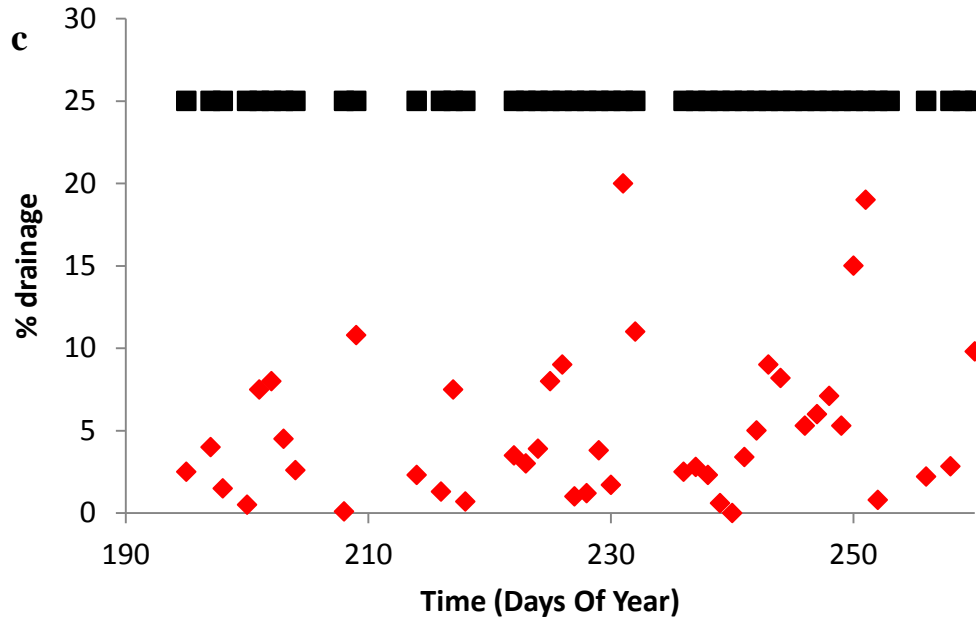

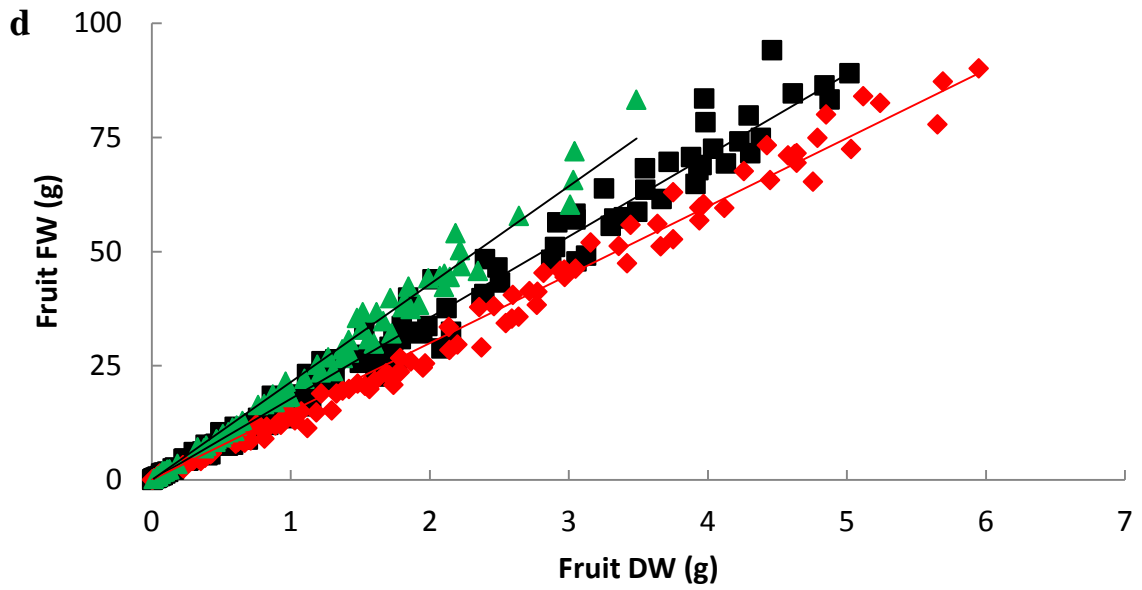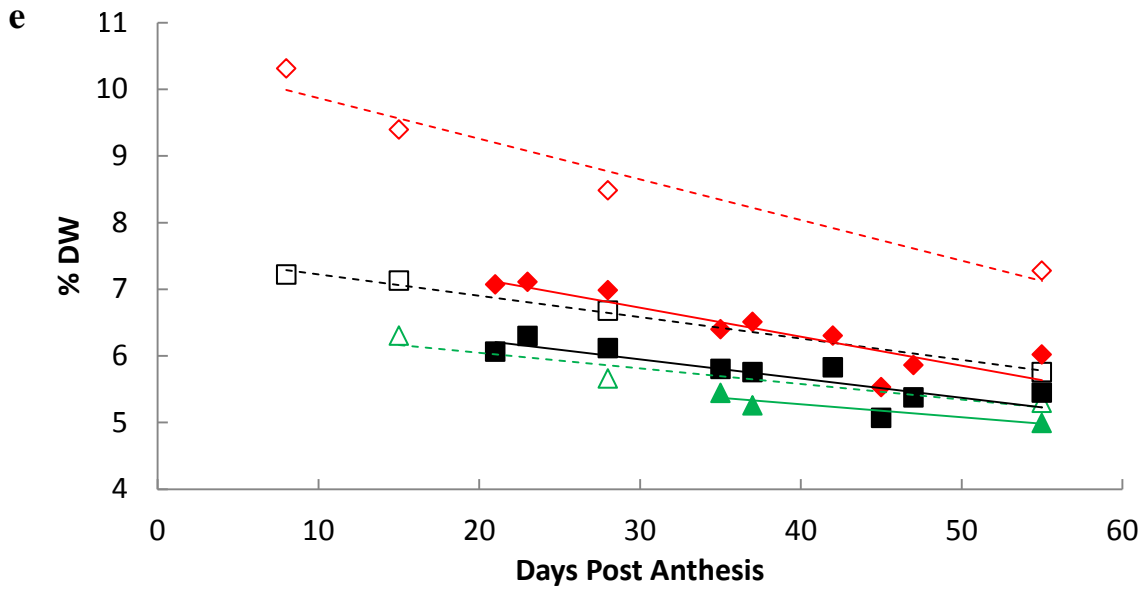



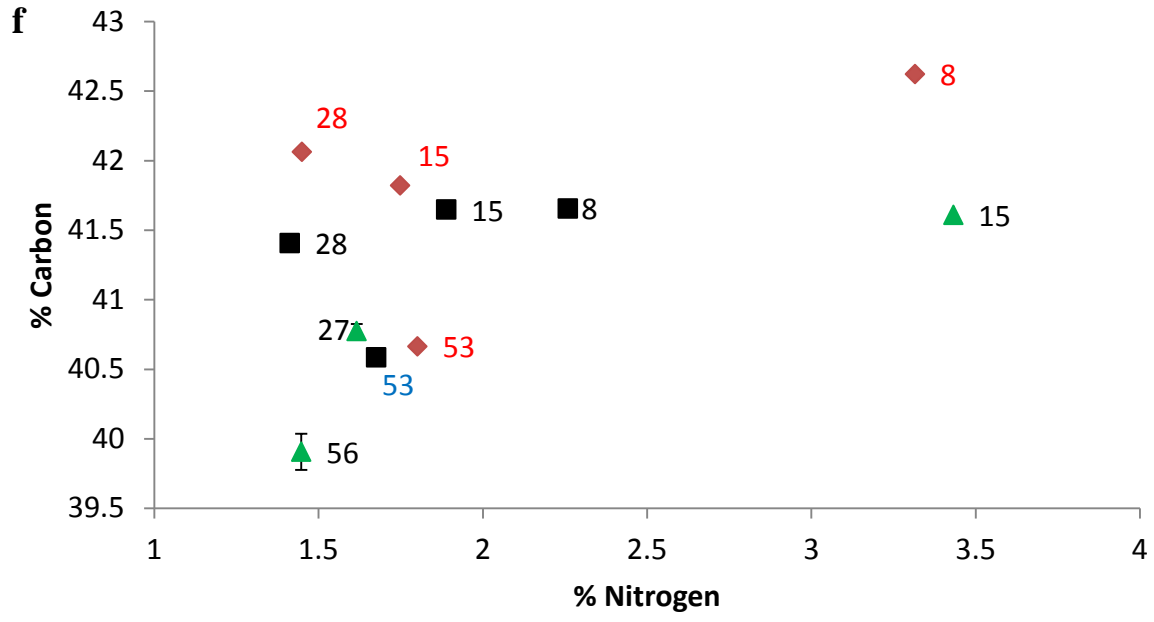

**Fig. S5** Fruit composition throughout development. Mass balance of tomato fruit pericarp analyzed at nine stages of development under (a) control, (b) water shortage and (c) shading conditions. Accumulated metabolites (sugars, organic acids and free amino acids) and biomass components (starch, cell wall, protein, lipids and nucleic acids) are experimental values expressed in  $\text{g g}^{-1}\text{DW}$ .

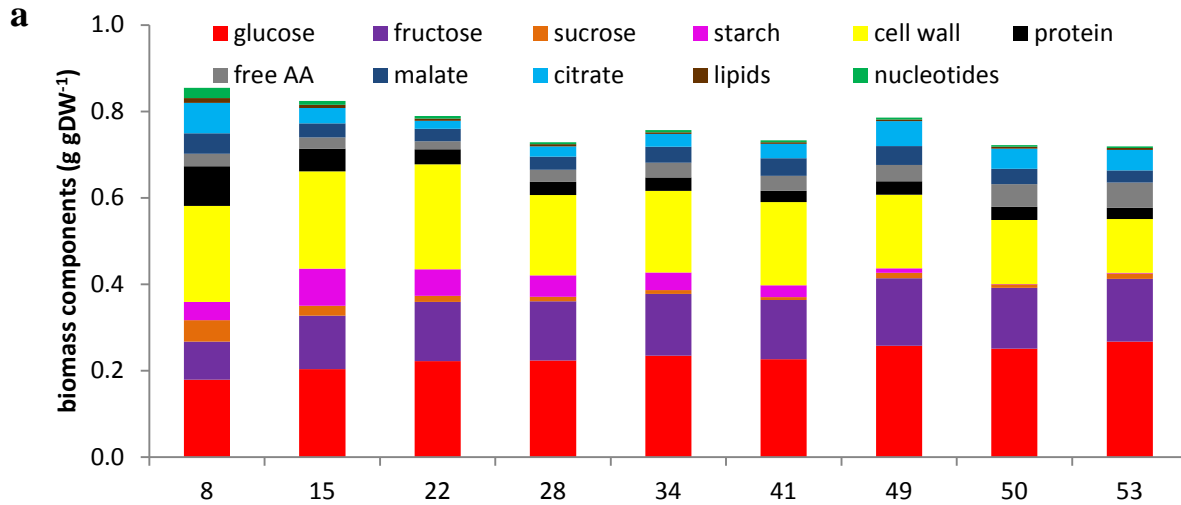

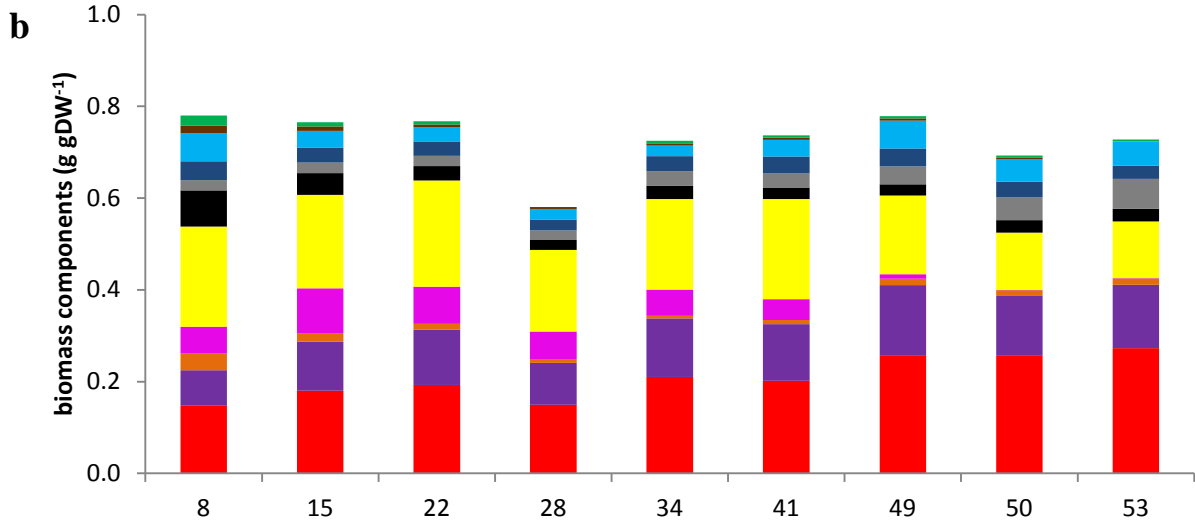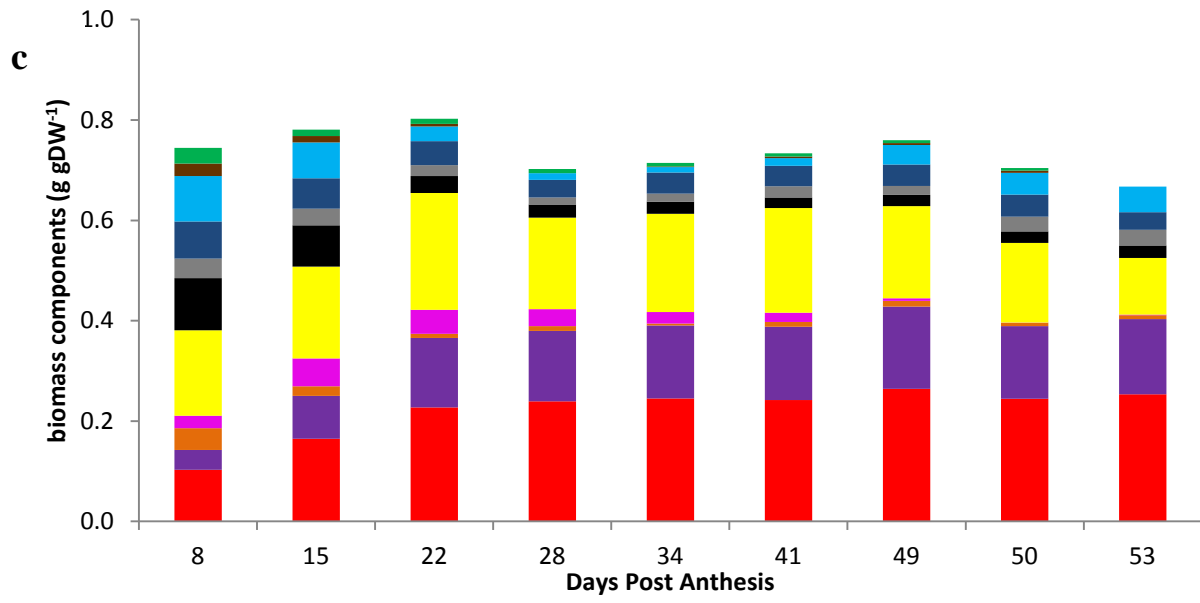

**Fig. S6** Origin of CO<sub>2</sub> released throughout tomato fruit development. Percentage of the five calculated fluxes – *V<sub>idh</sub>* and *V<sub>kgdh</sub>* for TCA, *V<sub>pdh</sub>*, *V<sub>me</sub>* and *V<sub>g6pdh</sub>* – on the total CO<sub>2</sub> released with the model solved on a daily basis using data obtained under (a) control, (b) water stress and (c) shading conditions.

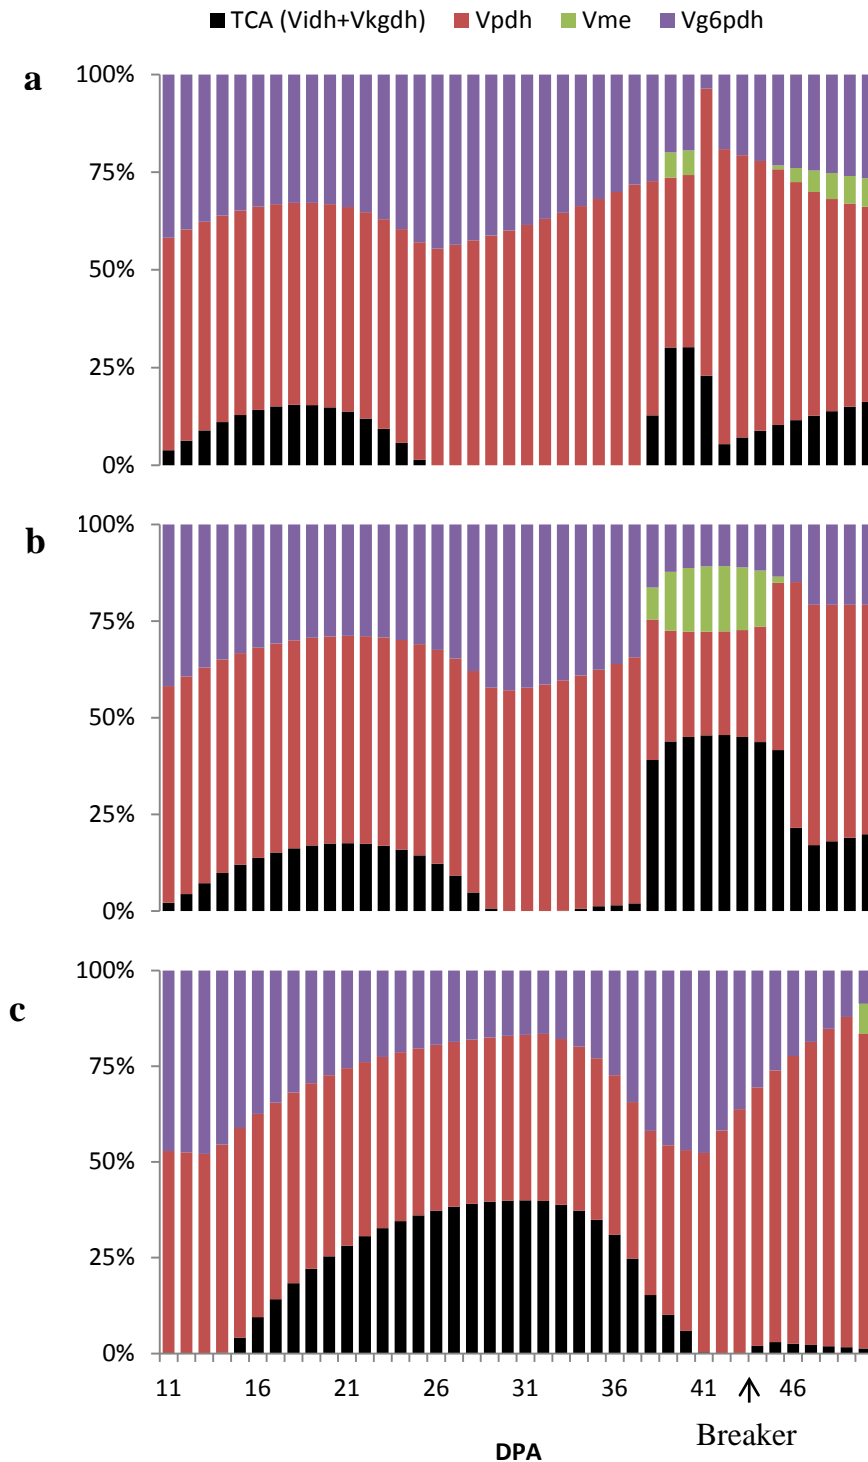

**Fig. S7** Galactose and galacturonate throughout the tomato fruit development. Time-course of free galactose (closed symbols) and galacturonate (open symbols) content in tomato fruit pericarp under control (squares), water shortage (triangles) and shading (circles) conditions.

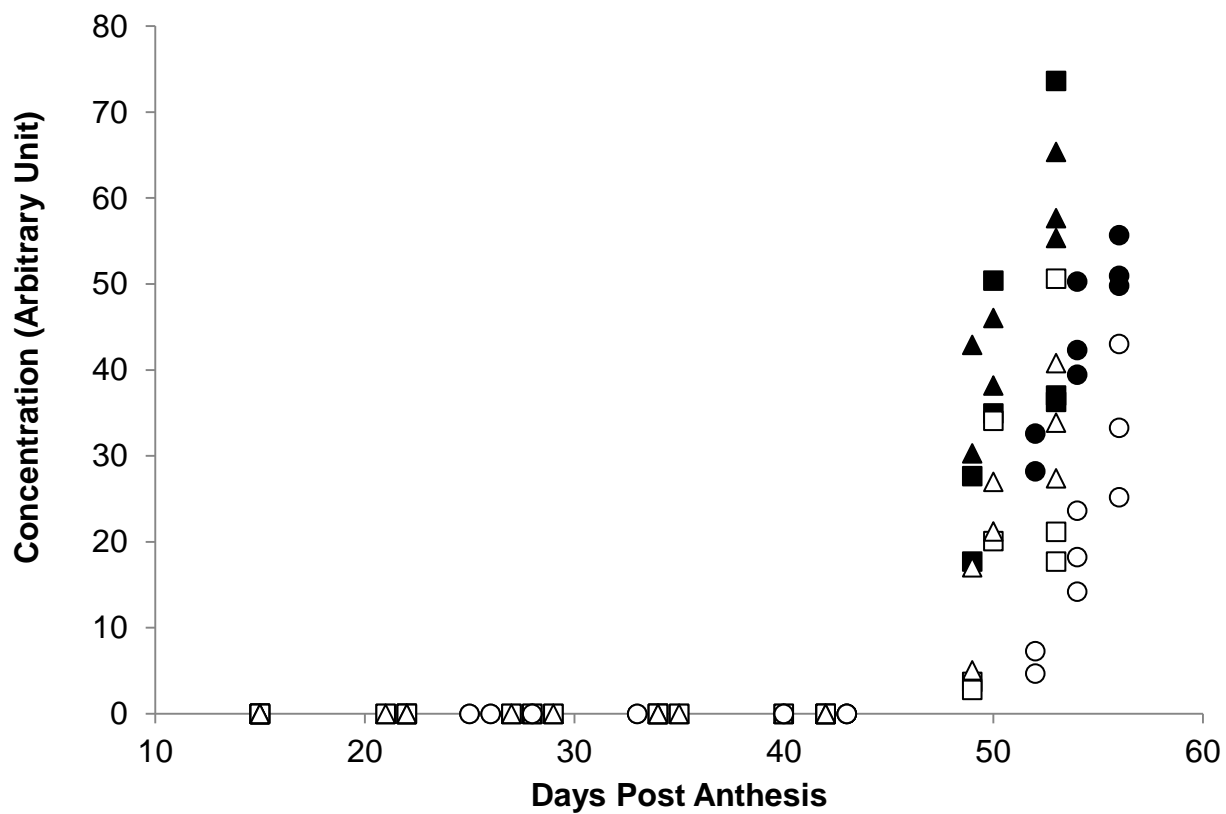

**Fig. S8** Estimated heat from metabolic activities. Time-course of the heat production rate estimated from respiration ( $\text{CO}_2$  released) with the tomato fruit model solved on a daily basis using data obtained under control (black), water stress (red) and shading (green) conditions.

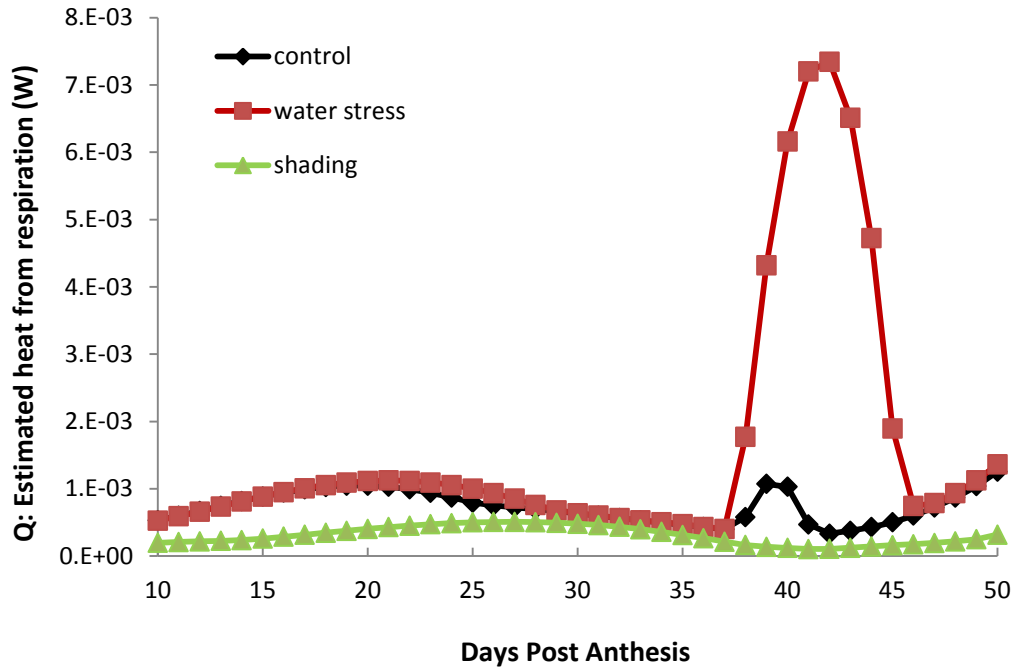

**Fig. S9** Fruit temperature and fruit energy variations. (a, e) Fruit age, (b, f) air and median fruit temperatures and (c, g) median fruit energy variations under control (black), water stress (red) and shading (green) conditions and (d, h) a scatter plot of fruit energy variation for the (a, b, c, d) second and the (e, f, g, h) last recording periods.

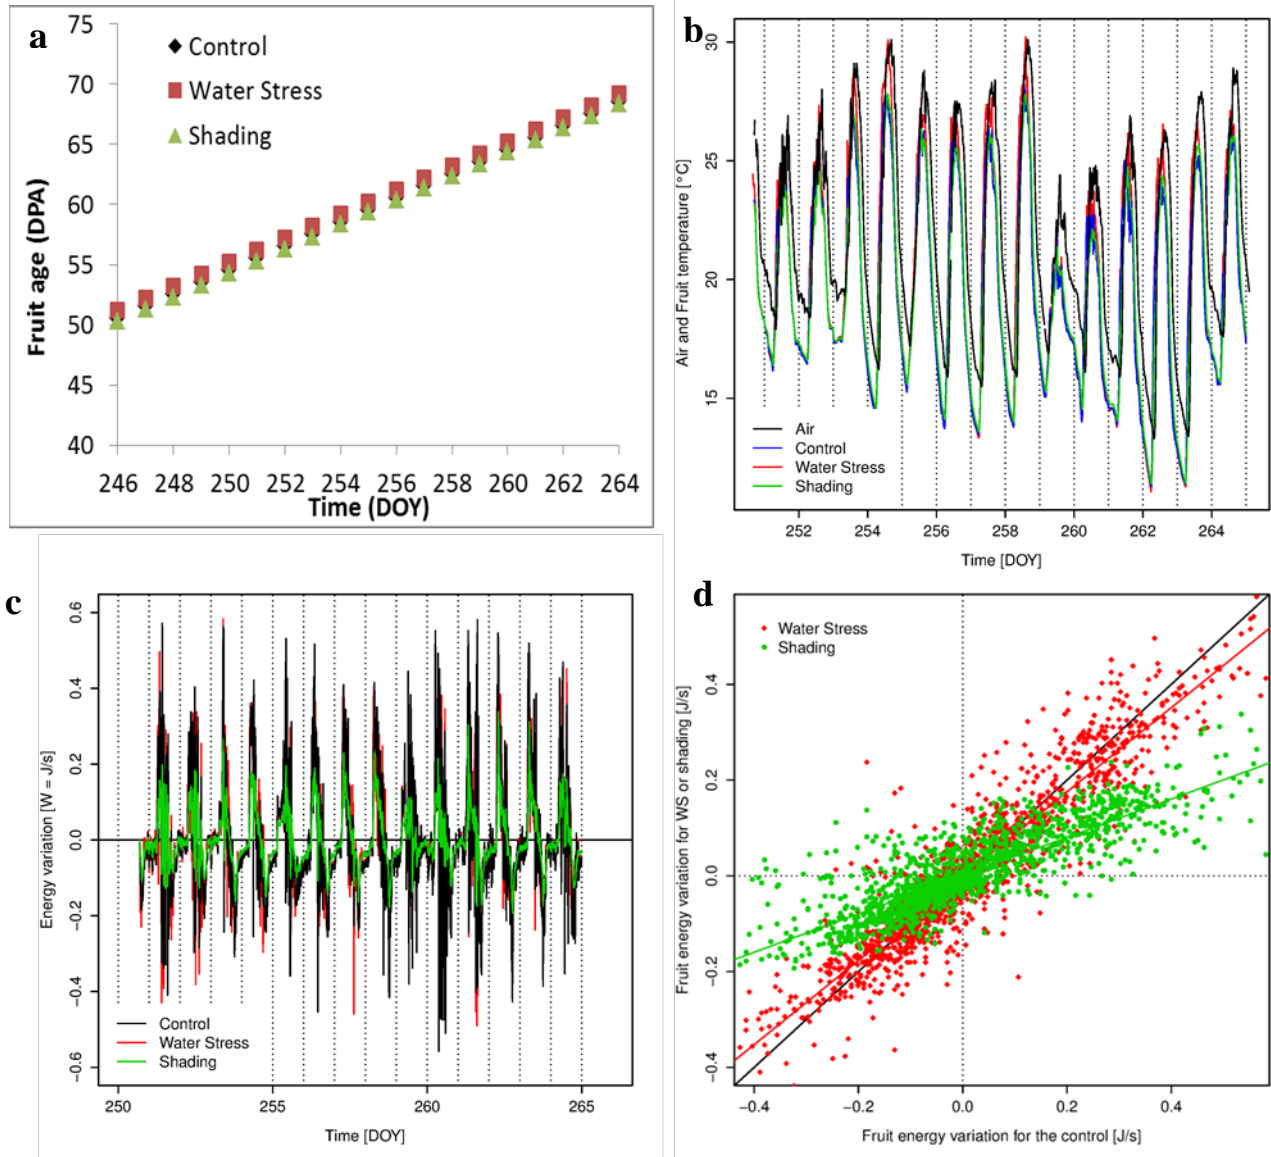

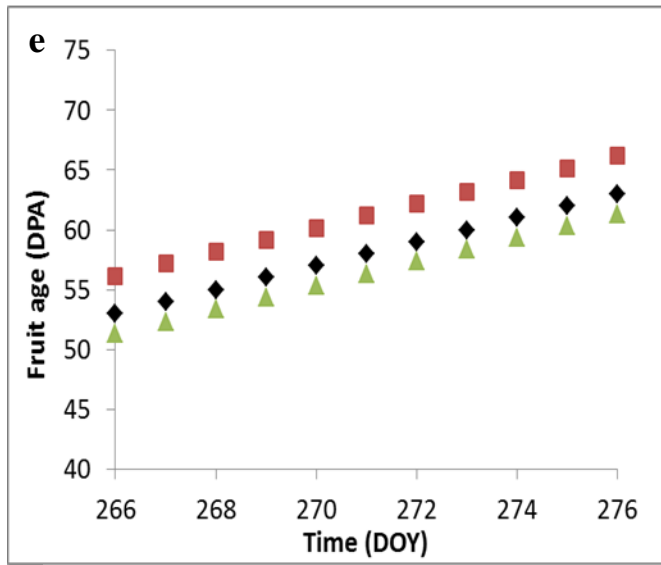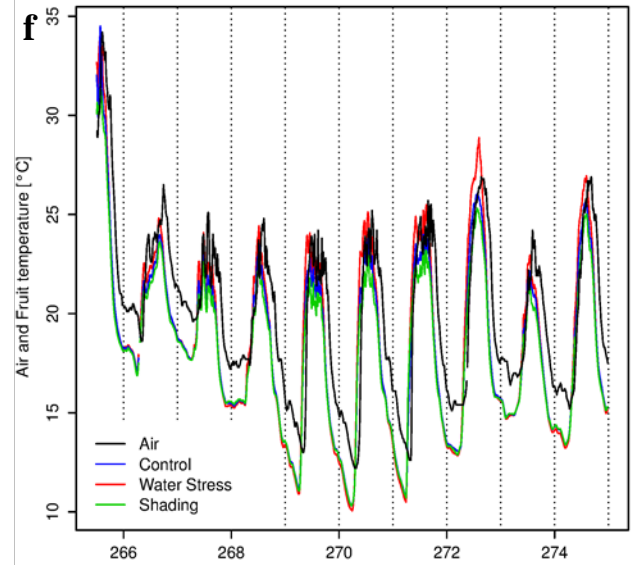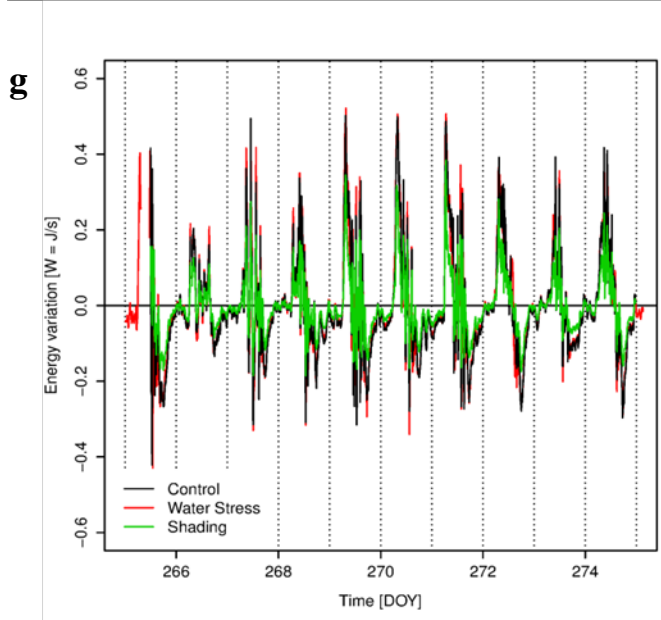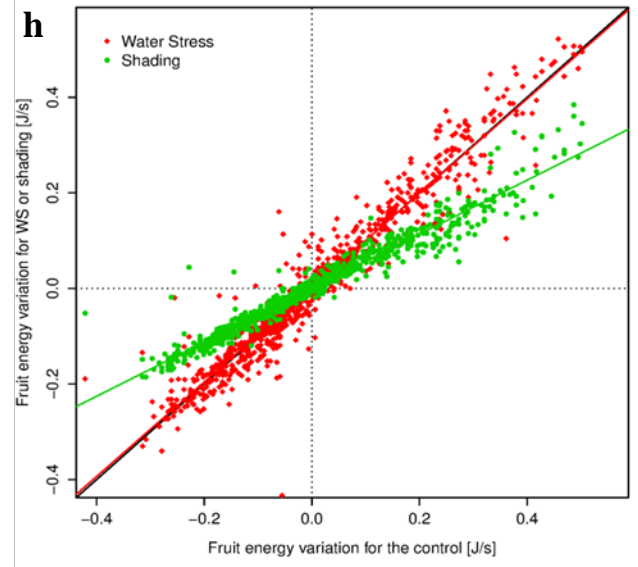



**Video S1** Flux maps of water stress compared to control. Short movie with one map per second comparing fluxes (expressed in  $\text{mmol fruit}^{-1} \text{d}^{-1}$ ) calculated solving the model on a daily basis from 2 to 53 DPA for tomato fruit grown under control (on the left) and water stress (on the right) conditions. Flux maps drew with OMIX with red arrows for positive fluxes and blue arrows for negative fluxes, accorded to the convention (Table S1).

**Notes S2** Mathematical demonstration of unicity of the flux solution.

Let us recall a standard result on strictly convex functions.

Let  $f$  be a continuous strictly convex function on  $\mathbb{R}^{n_{int}}$  and  $A_l$  a non-empty compact (closed and bounded) subset of  $\mathbb{R}^{n_{int}}$ .

**Theorem 2:** The optimization problem of finding some  $V_{int}^* \in \mathbb{R}^{n_{int}}$  such that

$$f(V_{int}^*) = \min\{f(V_{int}); V_{int} \in A_l\}$$
 admits a unique solution  $V_{int}^*$

**Proof:** The function  $f$  is continuous and is strictly convex that is

$$f(\lambda X + (1 - \lambda)Y) < \lambda f(X) + (1 - \lambda)f(Y) \text{ for } X \neq Y \text{ and } \forall \lambda \in ]0,1[$$

From the Weierstrass extreme values theorem,  $f$  continuous from  $A_l \subset \mathbb{R}^{n_{int}}$ ,  $A_l$  compact then the minimization problem  $\min f(X)$  with  $X \in A_l$  admits an optimal solution with  $X^* \in A_l$ .

The optimal solution is unique. Indeed if we assume that  $X \neq Y$  are two minima of  $f$  in  $A_l$

$$\text{Then we have } f(X) = f(Y) = \min f$$

But as  $f$  is strictly convex,  $f\left(\frac{X+Y}{2}\right) < \frac{f(X)}{2} + \frac{f(Y)}{2} = f(X)$  which leads to a contradiction.

**Theorem 1:** The problem

$$\text{Minimize } f(V) = \sum_{i=1}^n (v_i)^2 \quad (3)$$

Subject to the constraints:

$$NV = 0$$

$$V_{int,min}^l \leq V_{int} \leq V_{int,max}^l \quad \text{and} \quad V_{ext} = V_{ext}^l$$

admits a unique solution.

**Proof:** The stoichiometry matrix  $N$  can be reordered to be partitioned into  $1 \times 2$  blocks  $N =$

$$(N_1 \quad N_2)$$

where  $N_1$  is a  $m_{int} \times n_{int}$  matrix,  $N_2$  is a  $m_{int} \times n_{ext}$  matrix so that the steady state constraints

$$NV = 0 \text{ can be rewritten by } \begin{pmatrix} \frac{dx_{I,int}}{dt} \\ \frac{dx_{E,int}}{dt} \end{pmatrix} = (N_1 \quad N_2) \begin{pmatrix} V_{int} \\ V_{ext} \end{pmatrix} = 0 \Leftrightarrow N_1 V_{int} = -N_2 V_{ext}.$$

Then problem (3) is the optimization problem of finding some  $V_{int}^* \in \mathbb{R}^{n_{int}}$  such that

$$f(V_{int}^*) = \min\{f(V_{int}); V_{int} \in A_l\}$$

Where, for  $l=1, \dots, 50$  (corresponding to the stages of fruit development),

$$A_l = \left\{ V_{int} \in \mathbb{R}^{n_{int}}; N_1 V_{int} = -N_2 V_{ext}^l; V_{int,min}^l \leq V_{int} \leq V_{int,max}^l \right\} \subset \mathbb{R}^{n_{int}}$$

is the feasible set and  $f: \mathbb{R}^{n_{int}} \rightarrow \mathbb{R}$  is the objective function.

As  $A_l$  is a compact convex subset of  $\mathbb{R}^{n_{int}}$  (see lemma 1 below) and  $f$  is a strictly convex and continuous function on  $\mathbb{R}^{n_{int}}$ , from theorem 2, this strictly convex problem admits a unique solution  $V_{int}^*$  (for each  $l = 1 \dots 50$ ).

**Lemma 1:**  $A_l$  is a compact convex subset of  $\mathbb{R}^{n_{int}}$

**Proof :** set

$$A_{1l} = \{V_{int} \in \mathbb{R}^{n_{int}}; V_{int,min}^l \leq V_{int} \leq V_{int,max}^l\}$$

$$A_{2l} = \{V_{int} \in \mathbb{R}^{n_{int}}; N_1 V_{int} = -N_2 V_{ext}^l\}$$

1.  $A_l$  is bounded because  $A_l \subset A_{1l}$  which is bounded.
2. Set  $b = -N_2 V_{ext,l}$ . We check numerically that  $rank(N_1 | b) = rank(N_1)$ . So according to the Rouché–Capelli theorem, the linear system  $N_1 V_{int} = b$  admits solutions. The subset  $A_{2l}$  is not empty and is closed. Then  $A_l$  is closed as intersection of two closed subsets  $A_{il}$ .
3. For  $i \in \{1,2\}, \forall (X, Y) \in A_{il}$ , it is easy to prove that  $\forall \lambda \in [0,1]$  we also have  $\lambda X + (1 - \lambda)Y \in A_{il}$ .  $A_l$  is convex as intersection of two convex subsets.

So  $A_l$  is a compact convex subset.
